# Supplementary material for: Puerarin enhances intestinal function in piglets infected with porcine epidemic diarrhea virus
Source: PubMed Central journal article supplement (PMC7985190; doi:10.1038/s41598-021-85880-5), 2021-03-22

# **Puerarin enhances intestinal function in piglets infected with porcine epidemic diarrhea virus**

**Mengjun Wu<sup>1,3†</sup>, Dan Yi<sup>1†</sup>, Qian Zhang<sup>1†</sup>, Tao Wu<sup>1</sup>, Kui Yu<sup>1</sup>, Meng Peng<sup>1</sup>, Lei Wang<sup>1</sup>, Di Zhao<sup>1</sup>, Yongqing Hou<sup>1\*</sup>, and Guoyao Wu<sup>2</sup>**

<sup>1</sup>Hubei Key Laboratory of Animal Nutrition and Feed Science, Wuhan Polytechnic University, Wuhan, China 430023

<sup>2</sup>Department of Animal Science, Texas A&M University, College Station, Texas, USA 77843

<sup>3</sup>Department of Agricultural, Environmental and Food Sciences, University of Molise, Campobasso, Italy 86100

\* Correspondence:

Yongqing Hou, Ph. D

Hubei Key Laboratory of Animal Nutrition and Feed Science,  
Wuhan Polytechnic University, Wuhan 430023, China

E-mail address: houyq@aliyun.com

† These authors contributed equally to this work and should be considered co-first authors

Supplementary Material 1-original images of the western blot

Figure 5

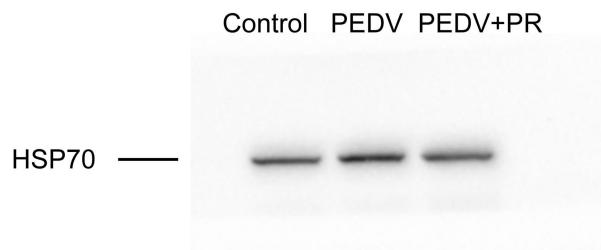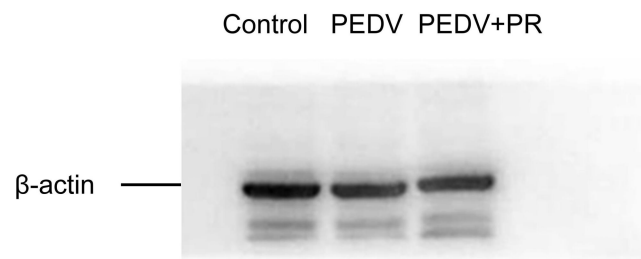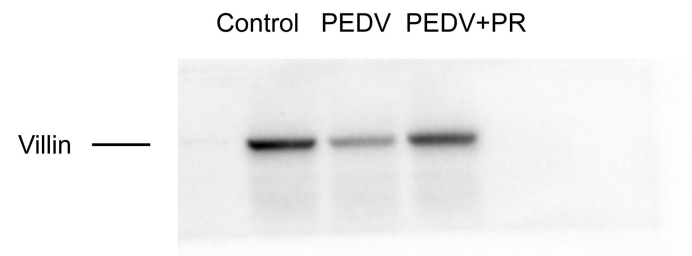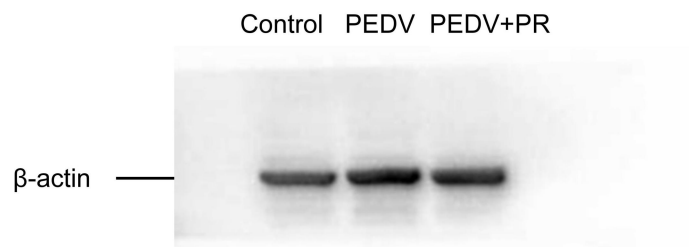

Supplement: 41598_2021_85880_MOESM1_ESM.pdf [file 41598_2021_85880_MOESM1_ESM.pdf]
